# Supplementary material for: A Smartphone Intervention to Promote Time Restricted Eating Reduces Body Weight and Blood Pressure in Adults with Overweight and Obesity: A Pilot Study
Source: Nutrients. 2021 Jun 23;13(7):2148. doi: 10.3390/nu13072148 (PMC8308240; doi:10.3390/nu13072148)
Supplement: Supplementary file 1 [file nutrients-13-02148-s001.zip › nutrients-1241661-supplementary.pdf]

# **Supplemental Figures Table of Contents**

- **Supplemental Table S1.** Baseline Characteristics of Run-in Completers vs. Non-completers
- **Supplemental Table S2.** Baseline Characteristics of TRE Completers vs. Non-completers
- **Supplemental Table S3.** Monthly Logging and Window Adherence during TRE
- **Supplemental Figure S2.** Individual logging adherence (2a) and window adherence (2b) during TRE
- **Supplemental Table S4:** Logging and Window Adherence by Month of TRE
- **Supplemental Figure S3 (a-e):** Changes in Anthropometrics of Individual Completers of TRE Intervention
- **Supplemental Table S5:** Change in Anthropometrics during TRE

Supplemental Table S1. Baseline Characteristics of Run-in Completers vs. Non-completers

| Variable                  | All (n=64)   | Completers<br>(n=50) | Non-completers<br>(n=14) | p-value      |
|---------------------------|--------------|----------------------|--------------------------|--------------|
| Age, y                    | 51 ± 12      | 51 ± 12              | 48 ± 9                   | 0.342        |
| Gender, % (n)             |              |                      |                          |              |
| Male                      | 22.7 (11)    | 18.0 (9)             | 14.3 (2)                 | 0.745        |
| Female                    | 82.8 (53)    | 82.0 (41)            | 85.7 (12)                |              |
| Non-Hispanic, % (n)       |              |                      |                          |              |
| Non-Hispanic              | 62.5 (40)    | 62.0 (31)            | 64.3 (9)                 | 0.876        |
| Hispanic                  | 37.5 (24)    | 38.0 (19)            | 35.7 (5)                 |              |
| Race, % (n)               |              |                      |                          |              |
| White                     | 56.0 (30)    | 56.0 (28)            | 14.3 (2)                 | <b>0.015</b> |
| Black                     | 51.6 (33)    | 42.0 (21)            | 85.7 (12)                |              |
| Asian                     | 1.6 (1)      | 2.0 (1)              | 0.0 (0)                  |              |
| Other                     | 0.0 (0)      | 0.0 (0)              | 0.0 (0)                  |              |
| Weight (kg)               | 93.1 ± 18.6  | 92.1 ± 18.2          | 96.7 ± 17.7              | 0.404        |
| +BMI (kg/m <sup>2</sup> ) | 31.1 ± 11.8  | 31.0 ± 10.8          | 30.1 ± 9.2               | 0.655        |
| +SBP (mmHg) (n=57)        | 118.0 ± 20.0 | 115.0 ± 20.0         | 122.0 ± 24.0             | 0.609        |
| DBP (mmHg) (n=57)         | 76.3 ± 10.2  | 75.3 ± 9.7           | 80.3 ± 11.8              | 0.120        |
| +WC (cm) (n=63)           | 98.9 ± 18.5  | 96.3 ± 15.7          | 101.2 ± 26.0             | 0.354        |

BMI, body mass index; SBP, systolic blood pressure; DBP, diastolic blood pressure; Values are reported as mean ± SD or count (%) except +BMI, SBP, WC, which were not normally distributed by Shapiro-Wilk test and are reported as median ± IQR, p-value from Wilcoxon two-sample test.

p<0.05; significance in **bold**

Supplemental Table S2. Baseline Characteristics of TRE Completers vs. Non-completers

| Variable                              | All (n=25)   | Completers<br>(n=16) | Non-completers<br>(n=9) | p-value      |
|---------------------------------------|--------------|----------------------|-------------------------|--------------|
| Age, y                                | 51 ± 10      | 51 ± 10              | 49 ± 11                 | 0.708        |
| Gender, % (n)                         |              |                      |                         |              |
| Male                                  | 16.0 (4)     | 25.0 (4)             | 0.0 (0)                 | 0.102        |
| Female                                | 84.0 (41)    | 75.0 (12)            | 100.0 (9)               |              |
| Non-Hispanic, % (n)                   |              |                      |                         |              |
| Non-Hispanic                          | 60.0 (15)    | 56.3 (9)             | 66.7 (6)                | 0.610        |
| Hispanic                              | 40.0 (10)    | 43.7 (7)             | 33.3 (3)                |              |
| Race, % (n)                           |              |                      |                         |              |
| White                                 | 36.0 (9)     | 37.5 (6)             | 33.3 (3)                | 0.707        |
| Black                                 | 60.0 (15)    | 56.3 (15)            | 66.7 (6)                |              |
| Asian                                 | 4.0 (1)      | 4.6 (1)              | 0.0 (0)                 |              |
| Other                                 | 0.0 (0)      | 0.0 (0)              | 0.0 (0)                 |              |
| Weight (kg)                           | 91.6 ± 18.3  | 92.5 ± 18.3          | 90.1 ± 20.6             | 0.766        |
| <sup>+</sup> BMI (kg/m <sup>2</sup> ) | 30.9 ± 10.4  | 30.3 ± 10.4          | 34.5 ± 14.6             | 0.419        |
| <sup>+</sup> SBP (mmHg) (n=19)        | 115.0 ± 20.0 | 124.0 ± 33.0         | 111.0 ± 40.0            | <b>0.012</b> |
| DBP (mmHg) (n=19)                     | 78.7 ± 8.7   | 79.0 ± 9.6           | 78.3 ± 7.6              | 0.868        |
| WC (cm) (n=24)                        | 100.0 ± 11.4 | 100.2 ± 9.0          | 99.8 ± 15.9             | 0.939        |

BMI, body mass index; SBP, systolic blood pressure; DBP, diastolic blood pressure; WC, waist circumference; Values are reported as mean ± SD or count (%) except <sup>+</sup>Weight, BMI, SBP, DBP, WC, which were not normally distributed by Shapiro-Wilk test and are reported as median ± IQR, p-value from Wilcoxon two-sample test.

p<0.05; significance in **bold**

Values measured at screening visit

Supplemental Table S3. Monthly Logging and Window Adherence during TRE (n=16)

| Participant | Logging Adherence<br>(Days/month) |         |         | Window Adherence<br>(Days/Month) |         |         |
|-------------|-----------------------------------|---------|---------|----------------------------------|---------|---------|
|             | Month 1                           | Month 2 | Month 3 | Month 1                          | Month 2 | Month 3 |
| 1           | 12                                | 4       | 9       | 4                                | 2       | 4       |
| 2           | 24                                | 18      | 24      | 17                               | 14      | 16      |
| 3           | 20                                | 20      | 31      | 13                               | 15      | 12      |
| 4           | 30                                | 29      | 23      | 27                               | 20      | 14      |
| 5           | 30                                | 30      | 23      | 26                               | 29      | 23      |
| 6           | 27                                | 19      | 0       | 11                               | 10      | 0       |
| 7           | 18                                | 6       | 0       | 14                               | 6       | 0       |
| 8           | 30                                | 9       | 0       | 18                               | 8       | 0       |
| 9           | 22                                | 14      | 11      | 14                               | 13      | 8       |
| 10          | 27                                | 26      | 30      | 22                               | 14      | 10      |
| 11          | 22                                | 19      | 12      | 18                               | 19      | 10      |
| 12          | 19                                | 18      | 13      | 17                               | 16      | 13      |
| 13          | 17                                | 15      | 16      | 15                               | 15      | 16      |
| 14          | 28                                | 26      | 11      | 28                               | 25      | 10      |
| 15          | 29                                | 27      | 21      | 16                               | 16      | 9       |
| 16          | 25                                | 23      | 23      | 18                               | 23      | 14      |

Note: Participants 6, 7, and 8 all had their final month occur during the holiday season

Supplemental Figure S2. Individual logging adherence (2a) and window adherence (2b) during the TRE intervention. Black bar: month 1; grey bar: month 2; white bar: month 3 (n=16).

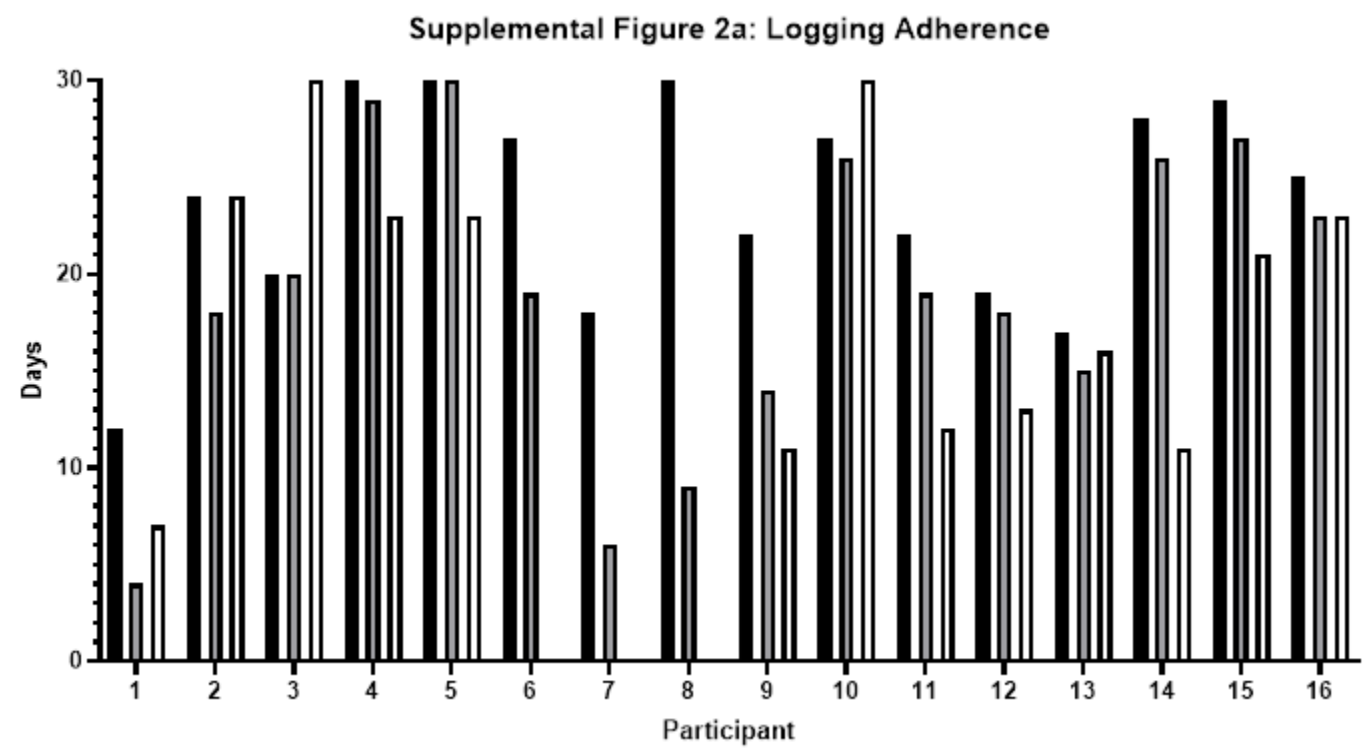

Supplemental Figure S2: Individual logging adherence (2a) and window adherence (2b) during the TRE intervention. Black bar: month 1; grey bar: month 2; white bar: month 3 (n=16).

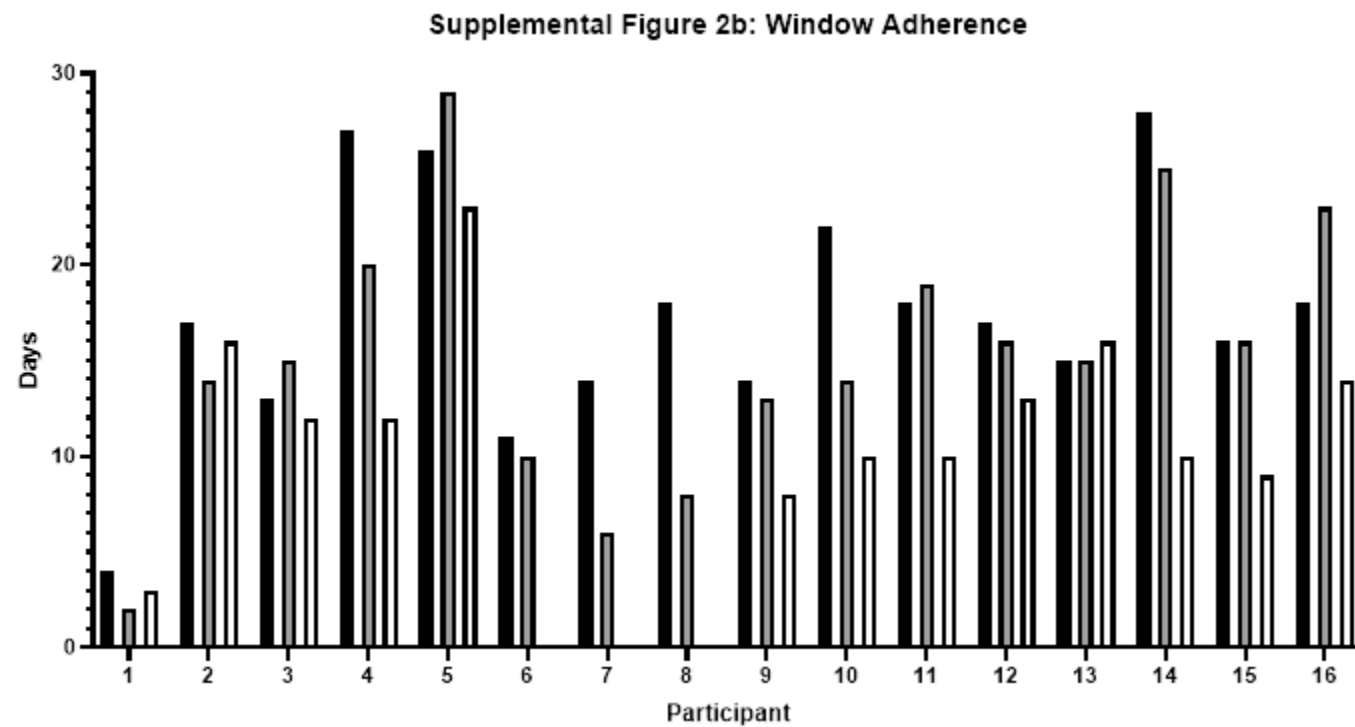

Supplemental Table S4: Logging and Window Adherence by Month of TRE (n=16)

| Variable                 | Month 1    | Month 2    | Month 3    | p-value      |
|--------------------------|------------|------------|------------|--------------|
| Logging Adherence (days) | 22.4 ± 5.1 | 19.4 ± 8.1 | 14.3 ± 9.3 | <b>0.016</b> |
| Window Adherence (days)  | 16.6 ± 5.9 | 13.4 ± 6.7 | 8.9 ± 6.8  | <b>0.006</b> |

Values are reported as mean ± SD

p<0.05; significance in **bold**

Supplemental Figure S3 (a-e): Changes in Anthropometrics of Individual Completers of TRE Intervention

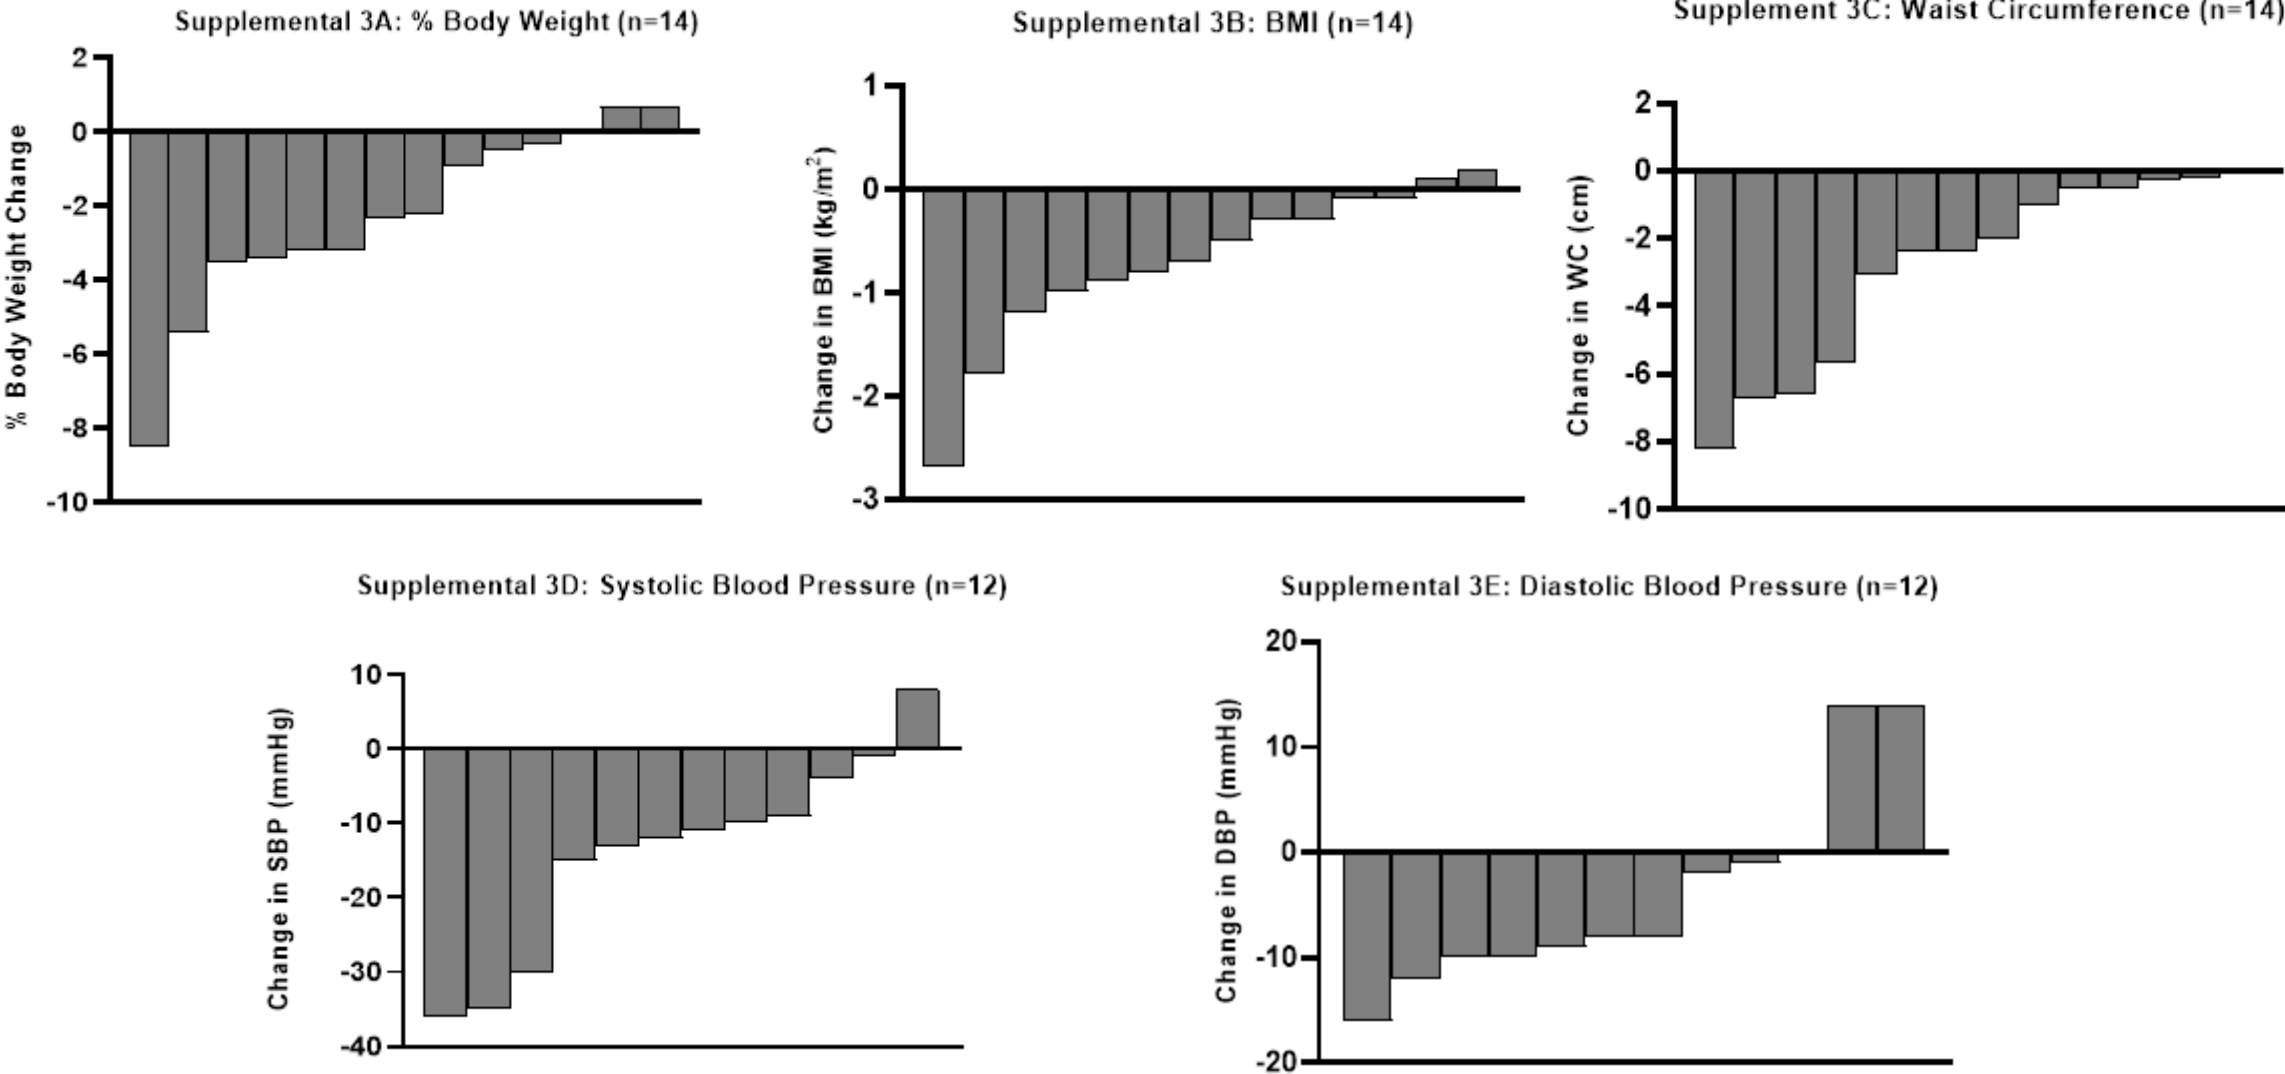

Supplemental Table S5: Change in Anthropometrics during TRE (n=16)

| Participant | Reduction of Eating Duration (hh:mm) | % BW Change | BMI (kg/m <sup>2</sup> ) | WC (cm)     | SBP (mmHg) | DBP (mmHg) |
|-------------|--------------------------------------|-------------|--------------------------|-------------|------------|------------|
| 1           | 2h35m                                | <b>-3.2</b> | -1                       | <b>-5.7</b> | <b>-36</b> | -1         |
| 2           | 4h25m                                | <b>-5.4</b> | -1.8                     | <b>-6.6</b> | <b>-12</b> | <b>-8</b>  |
| 3           | 1h26m                                | <b>-3.4</b> | -0.7                     | -0.5        | N/A        | N/A        |
| 4           | 0h12m                                | <b>-8.5</b> | -2.7                     | <b>-6.7</b> | N/A        | N/A        |
| 5           | 7h50m                                | <b>-3.5</b> | -0.8                     | <b>-3.1</b> | <b>-15</b> | <b>-10</b> |
| 6           | 1h47m                                | -0.9        | -0.1                     | 0.1         | <b>-13</b> | <b>-16</b> |
| 7           | 4h55m                                | 0.7         | -0.3                     | -0.2        | <b>-30</b> | <b>-8</b>  |
| 8           | 4h05m                                | -0.5        | -0.3                     | -0.3        | <b>-10</b> | <b>-10</b> |
| 9           | 3h11m                                | 0.1         | 0.1                      | -2          | -4         | 0          |
| 10          | 6h36m                                | -2.2        | -0.9                     | -2.4        | -1         | <b>-12</b> |
| 11          | 2h45m                                | N/A         | N/A                      | N/A         | N/A        | N/A        |
| 12          | 5h33m                                | -2.3        | -1.2                     | <b>-8.2</b> | 8          | <b>14</b>  |
| 13          | 8h59m                                | -0.3        | -0.1                     | -0.5        | <b>-35</b> | <b>-9</b>  |
| 14          | 4h15m                                | <b>-3.2</b> | -0.5                     | -1          | -9         | -2         |
| 15          | 3h06m                                | N/A         | N/A                      | N/A         | N/A        | N/A        |
| 16          | 4h13m                                | 0.7         | 0.2                      | -2.4        | <b>-11</b> | <b>14</b>  |
